# Supplementary material for: XRCC4 rs28360071 intronic variant is associated with increased risk for infant acute lymphoblastic leukemia with KMT2A rearrangements
Source: PubMed Central journal article supplement (PMC7734917; doi:10.1590/1678-4685-gmb-2020-0160), 2020-12-02
Supplement: 1415-4757-GMB-43-4-e20200160-s1.pdf [file 1415-4757-GMB-43-4-e20200160-s1.pdf]

**Supplementary Material to “XRCC4 rs28360071 intronic variant is associated with increased risk for infant acute lymphoblastic leukemia with KMT2A rearrangements”**

**Table S1** – Allele and genotype frequencies of XRCC6 rs5751129, XRCC4 rs6869366 and XRCC4 rs28360071 in cases and controls.

|                         | Controls   | Cases      |
|-------------------------|------------|------------|
|                         | n (%)      | n (%)      |
| <b>XRCC6 rs5751129</b>  |            |            |
| T                       | 259 (63.2) | 369 (63.2) |
| C                       | 151 (36.8) | 215 (36.8) |
| TT                      | 80 (39.0)  | 118 (40.5) |
| TC                      | 99 (48.2)  | 133 (45.5) |
| CC                      | 26 (12.8)  | 41 (14.0)  |
| <i>p</i> Value          | 0.710      | 0.660      |
| <b>XRCC4 rs6869366</b>  |            |            |
| T                       | 541 (92.0) | 361 (94.5) |
| G                       | 47 (8.0)   | 21 (5.5)   |
| TT                      | 249 (84.7) | 172 (90.0) |
| TG                      | 43 (14.6)  | 17 (8.9)   |
| GG                      | 2 (0.7)    | 2 (1.1)    |
| <i>p</i> Value          | 0.700      | 0.100      |
| <b>XRCC4 rs28360071</b> |            |            |
| I                       | 597 (53.9) | 289 (54.1) |
| D                       | 511 (46.1) | 245 (45.9) |
| II                      | 164 (29.6) | 77 (28.8)  |
| ID                      | 269 (48.5) | 135 (50.6) |
| DD                      | 121 (21.8) | 55 (20.6)  |
| <i>p</i> Value          | 0.340      | 0.805      |

*p* Value: Hardy-Weinberg equilibrium.
