# Supplementary material for: XRCC4 rs28360071 intronic variant is associated with increased risk for infant acute lymphoblastic leukemia with KMT2A rearrangements
Source: PubMed Central journal article supplement (PMC7734917; doi:10.1590/1678-4685-gmb-2020-0160), 2020-12-02
Supplement: 1415-4757-GMB-43-4-e20200160-s2.pdf [file 1415-4757-GMB-43-4-e20200160-s2.pdf]

**Supplementary Material to “XRCC4 rs28360071 intronic variant is associated with increased risk for infant acute lymphoblastic leukemia with *KMT2A* rearrangements”**

**Table S2** – Genotype frequencies of *XRCC6* rs5751129 in EAL subtypes and *KMT2A* status.

| <i>XRCC6</i><br>rs5751129 | Control<br>n (%)          | ALL<br>n (%)              | AML<br>n (%)              |                           |
|---------------------------|---------------------------|---------------------------|---------------------------|---------------------------|
| TT                        | 118 (40.4)                | 42 (35.0)                 | 38 (44.7)                 |                           |
| TC                        | 133 (45.5)                | 58 (48.3)                 | 41 (48.2)                 |                           |
| CC                        | 41 (14.0)                 | 20 (16.7)                 | 6 (7.1)                   |                           |
| Genetic Model             | <i>p</i><br>OR (CI)       | <i>p</i><br>aOR (CI)      | <i>p</i><br>OR (CI)       | <i>p</i><br>aOR (CI)      |
| Dominant                  | 0.320<br>1.26 (0.81-2.00) | 0.115<br>1.10 (0.75-1.53) | 0.532<br>0.84 (0.52-1.40) | 0.700<br>0.89 (0.54-1.49) |
| Recessive                 | 0.542<br>1.22 (0.70-2.20) | 0.257<br>0.90 (0.53-1.51) | 0.095<br>0.50 (0.20-1.14) | 0.142<br>0.50 (0.20-1.25) |
| TT vs. TC                 | 0.410<br>1.22 (0.80-2.00) | 0.211<br>1.10 (0.75-1.62) | 0.900<br>1.00 (0.60-1.60) | 0.984<br>1.00 (0.59-1.70) |
| TT vs. CC                 | 0.402<br>1.40 (0.72-2.60) | 0.100<br>0.94 (0.53-1.65) | 0.110<br>0.45 (0.20-1.15) | 0.200<br>0.52 (0.20-1.37) |
| Additive                  | 0.300<br>1.30 (0.90-2.00) | 0.070<br>0.66 (0.42-1.03) | 0.272<br>0.80 (0.50-1.23) | 0.474<br>1.19 (0.73-1.96) |
| <i>KMT2A</i> -WT          |                           |                           |                           |                           |
| <i>XRCC6</i><br>rs5751129 | Control<br>n (%)          | ALL<br>n (%)              | AML<br>n (%)              |                           |
| TT                        | 118 (40.4)                | 19 (40.4)                 | 17 (48.6)                 |                           |
| TC                        | 133 (45.5)                | 21 (44.7)                 | 15 (42.9)                 |                           |
| CC                        | 41 (14.0)                 | 7 (14.9)                  | 3 (8.6)                   |                           |
| Genetic Model             | <i>p</i><br>OR (CI)       | <i>p</i><br>aOR (CI)      | <i>p</i><br>OR (CI)       | <i>p</i><br>aOR (CI)      |
| Dominant                  | 1.000<br>1.00 (0.53-2.00) | 0.762<br>0.90 (0.47-1.71) | 0.400<br>0.72 (0.40-1.45) | 0.670<br>1.17 (0.56-2.43) |
| Recessive                 | 0.824<br>1.10 (0.45-2.55) | 0.638<br>0.80 (0.33-1.96) | 0.600<br>0.60 (0.20-2.00) | 0.532<br>1.49 (0.42-5.20) |
| TT vs. TC                 | 1.000<br>1.00 (0.50-1.91) | 0.852<br>0.93 (0.47-1.85) | 0.575<br>0.80 (0.40-1.64) | 0.810<br>1.09 (0.51-2.35) |
| TT vs. CC                 | 1.000<br>1.10 (0.42-2.71) | 0.504<br>0.71 (0.26-1.91) | 0.411<br>0.51 (0.14-1.82) | 0.592<br>1.43 (0.38-5.35) |
| Additive                  | 1.000<br>1.01 (0.55-1.85) | 0.699<br>0.88 (0.47-1.64) | 0.300<br>0.70 (0.34-1.34) | 0.587<br>1.21 (0.60-2.46) |
| <i>KMT2A</i> -r           |                           |                           |                           |                           |
| <i>XRCC6</i><br>rs5751129 | Control<br>n (%)          | ALL<br>n (%)              | AML<br>n (%)              |                           |
| TT                        | 118 (40.4)                | 19 (32.2)                 | 8 (44.4)                  |                           |
| TC                        | 133 (45.5)                | 31 (52.5)                 | 10 (55.6)                 |                           |
| CC                        | 41 (14.0)                 | 9 (15.3)                  | 0 (0.0)                   |                           |
| Genetic Model             | <i>p</i><br>OR (CI)       | <i>p</i><br>aOR (CI)      | <i>p</i><br>OR (CI)       | <i>p</i><br>aOR (CI)      |
| Dominant                  | 0.310<br>1.43 (0.80-2.60) | 0.100<br>1.67 (0.90-3.09) | 0.810<br>0.85 (0.33-2.21) | 0.536<br>0.73 (0.27-1.97) |
| Recessive                 | 0.840<br>1.10 (0.50-2.41) | 0.521<br>1.30 (0.57-2.95) | -                         | -                         |
| TT vs. TC                 | 0.300<br>1.45 (0.80-2.70) | 0.140<br>1.62 (0.85-3.08) | 1.000<br>1.11 (0.42-2.90) | 0.914<br>0.94 (0.34-2.56) |
| TT vs. CC                 | 0.493<br>1.36 (0.57-3.25) | 0.183<br>1.87 (0.74-4.75) | -                         | -                         |
| Additive                  | 0.263<br>1.41 (0.80-2.52) | 0.075<br>0.58 (0.31-1.05) | 0.500<br>0.70 (0.30-1.80) | 0.309<br>1.67 (0.61-4.53) |

ALL: Acute Lymphoblastic Leukemia; AML: Acute Myeloid Leukemia; OR: Odds ratio; aOR: Odds ratio adjusted by non-whites and sex; *KMT2A*-WT: *KMT2A* wild type; *KMT2A*-r: *KMT2A* rearrangements.
