# Supplementary material for: XRCC4 rs28360071 intronic variant is associated with increased risk for infant acute lymphoblastic leukemia with KMT2A rearrangements
Source: PubMed Central journal article supplement (PMC7734917; doi:10.1590/1678-4685-gmb-2020-0160), 2020-12-02
Supplement: 1415-4757-GMB-43-4-e20200160-s3.pdf [file 1415-4757-GMB-43-4-e20200160-s3.pdf]

**Supplementary Material to “XRCC4 rs28360071 intronic variant is associated with increased risk for infant acute lymphoblastic leukemia with KMT2A rearrangements”**

**Table S3** - Genotype frequencies of XRCC4 rs6869366 in EAL subtypes and KMT2A status.

| <i>XRCC4</i><br>rs6869366 | Control<br>n (%)          | ALL<br>n (%)              | AML<br>n (%)              |                           |
|---------------------------|---------------------------|---------------------------|---------------------------|---------------------------|
| TT                        | 249<br>(84.7)             | 97 (90.7)                 | 75 (89.3)                 |                           |
| TG                        | 43<br>(14.6)              | 10 (9.3)                  | 7 (8.3)                   |                           |
| GG                        | 2 (0.7)                   | 0 (0.0)                   | 2 (2.4)                   |                           |
| Genetic Model             | <i>p</i><br>OR (CI)       | <i>p</i><br>aOR (CI)      | <i>p</i><br>OR (CI)       | <i>p</i><br>aOR (CI)      |
| Dominant                  | 0.141<br>0.60 (0.30-1.20) | 0.166<br>0.61 (0.35-1.10) | 0.400<br>0.70 (0.31-1.42) | 0.336<br>0.68 (0.31-1.47) |
| Recessive                 | -                         | -                         | 0.215<br>3.60 (0.50-25.7) | 0.195<br>3.76 (0.50-27.9) |
| TT vs. TG                 | 0.185<br>0.59 (0.28-1.25) | 0.207<br>0.60 (0.32-1.04) | 0.200<br>0.54 (0.23-1.25) | 0.180<br>0.55 (0.24-1.30) |
| TT vs. GG                 | -                         | -                         | 0.240<br>3.32 (0.50-24.0) | 0.234<br>3.38 (0.45-25.3) |
| Additive                  | 0.107<br>0.54 (0.26-1.12) | 0.133<br>1.75 (0.84-3.67) | 0.610<br>0.80 (0.40-1.60) | 0.540<br>1.25 (0.61-2.55) |
| <i>KMT2A-WT</i>           |                           |                           |                           |                           |
| <i>XRCC4</i><br>rs6869366 | Control<br>n (%)          | ALL<br>n (%)              | AML<br>n (%)              |                           |
| TT                        | 249<br>(84.7)             | 34 (85.0)                 | 26 (89.7)                 |                           |
| TG                        | 43<br>(14.6)              | 6 (15.0)                  | 2 (6.9)                   |                           |
| GG                        | 2 (0.7)                   | 0 (0.0)                   | 1 (3.4)                   |                           |
| Genetic Model             | <i>p</i><br>OR (CI)       | <i>p</i><br>aOR (CI)      | <i>p</i><br>OR (CI)       | <i>p</i><br>aOR (CI)      |
| Dominant                  | 1.000<br>1.00 (0.40-2.50) | 0.947<br>1.03 (0.40-2.62) | 0.600<br>0.70 (0.20-2.20) | 0.496<br>1.54 (0.44-5.41) |
| Recessive                 | -                         | -                         | 0.250<br>5.21 (0.50-59.3) | 0.181<br>0.17 (0.01-2.28) |
| TT vs. TG                 | 1.000<br>1.02 (0.41-2.60) | 0.971<br>0.98 (0.38-2.50) | 0.400<br>0.45 (0.10-1.95) | 0.297<br>2.20 (0.49-9.75) |
| TT vs. GG                 | -                         | -                         | 0.265<br>4.80 (0.42-54.6) | 0.218<br>0.19 (0.01-2.61) |
| Additive                  | 1.000<br>0.94 (0.40-2.35) | 0.871<br>1.07 (0.42-2.74) | 1.000<br>0.81 (0.30-2.44) | 0.733<br>1.21 (0.39-3.72) |
| <i>KMT2A-r</i>            |                           |                           |                           |                           |
| <i>XRCC4</i><br>rs6869366 | Control<br>n (%)          | ALL<br>n (%)              | AML<br>n (%)              |                           |
| TT                        | 249<br>(84.7)             | 56 (94.9)                 | 15 (78.9)                 |                           |
| TG                        | 43<br>(14.6)              | 3 (5.1)                   | 3 (15.8)                  |                           |

| <i>XRCC4</i><br>rs6869366 | Control<br>n (%)        | ALL<br>n (%)         | AML<br>n (%)        |                      |
|---------------------------|-------------------------|----------------------|---------------------|----------------------|
| GG                        | 2 (0.7)                 | 0 (0.0)              | 1 (5.3)             |                      |
| Genetic Model             | <i>p</i><br>OR (CI)     | <i>p</i><br>aOR (CI) | <i>p</i><br>OR (CI) | <i>p</i><br>aOR (CI) |
|                           | <b>0.040</b>            | 0.054                | 0.514               | 0.495                |
| <b>Dominant</b>           | <b>0.30 (0.09-1.00)</b> | 0.30 (0.08-1.01)     | 1.50 (0.50-4.65)    | 1.49 (0.46-4.76)     |
| <b>Recessive</b>          | -                       | -                    | 0.172               | 0.082                |
|                           | 0.055                   | 0.060                | 8.11 (0.70-93.7)    | 10.6 (0.74-153.)     |
| <b>TT vs. TG</b>          | 0.31 (0.10-1.04)        | 0.31 (0.09-1.05)     | 0.740               | 0.810                |
|                           |                         |                      | 1.20 (0.32-4.20)    | 0.85 (0.23-3.09)     |
| <b>TT vs. GG</b>          | -                       | -                    | 0.170               | 0.103                |
|                           |                         |                      | 8.30 (0.71-96.8)    | 9.16 (0.63-131.)     |
| <b>Additive</b>           | <b>0.040</b>            | 0.050                | 0.345               | 0.295                |
|                           | <b>0.30 (0.10-0.95)</b> | 0.42 (0.01-1.11)     | 1.80 (0.61-5.10)    | 0.56 (0.19-1.64)     |

ALL: Acute Lymphoblastic Leukemia; AML: Acute Myeloid Leukemia; OR: Odds ratio; aOR: Odds ratio adjusted by skin color and sex; *KMT2A*-WT: *KMT2A* wild type; *KMT2A*-r: *KMT2A* rearranged.
