# Supplementary material for: XRCC4 rs28360071 intronic variant is associated with increased risk for infant acute lymphoblastic leukemia with KMT2A rearrangements
Source: PubMed Central journal article supplement (PMC7734917; doi:10.1590/1678-4685-gmb-2020-0160), 2020-12-02
Supplement: 1415-4757-GMB-43-4-e20200160-s4.pdf [file 1415-4757-GMB-43-4-e20200160-s4.pdf]

### Supplementary Material to “*XRCC4* rs28360071 intronic variant is associated with increased risk for infant acute lymphoblastic leukemia with *KMT2A* rearrangements”

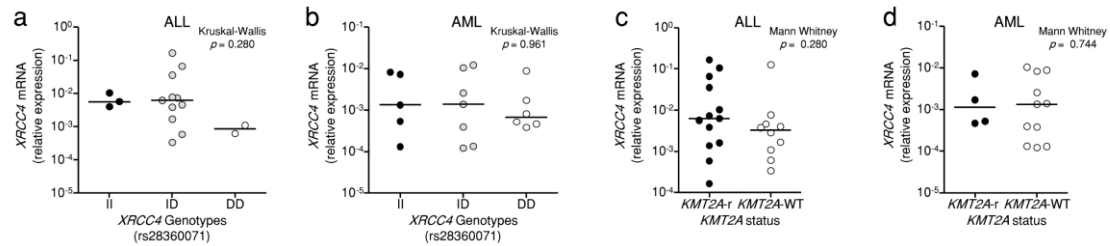

**Figure S1** – Differential levels of *XRCC4* mRNA in EAL bone marrow samples. Expression levels of *XRCC4* in ALL patients (a) and AML patients (b) according to rs28360071 genotypes. Comparison of *XRCC4* expression levels in patients harboring *KMT2A*, rearranged (*KMT2A-r*) and *KMT2A-WT* according to rs28360071 genotypes in ALL patients (c) and AML patients (d). Experiments were performed in triplicates. Horizontal bars indicate median values.
