# Supplementary material for: XRCC4 rs28360071 intronic variant is associated with increased risk for infant acute lymphoblastic leukemia with KMT2A rearrangements
Source: PubMed Central journal article supplement (PMC7734917; doi:10.1590/1678-4685-gmb-2020-0160), 2020-12-02
Supplement: 1415-4757-GMB-43-4-e20200160-s5.pdf [file 1415-4757-GMB-43-4-e20200160-s5.pdf]

## Supplementary Material to “*XRCC4* rs28360071 intronic variant is associated with increased risk for infant acute lymphoblastic leukemia with *KMT2A* rearrangements”

| Interpreted Data                                                                                                                                                                                                                                                                |                                       |                                                      |                                                                                                                 |
|---------------------------------------------------------------------------------------------------------------------------------------------------------------------------------------------------------------------------------------------------------------------------------|---------------------------------------|------------------------------------------------------|-----------------------------------------------------------------------------------------------------------------|
| <p>This table shows only relevant results related to the mutation position and context.<br/>                     The mutation occurs in the deep intronic positions, the following table show results of splicing and auxiliary sites that could be created by the mutation</p> |                                       |                                                      |                                                                                                                 |
| Predicted signal                                                                                                                                                                                                                                                                | Prediction algorithm                  | cDNA Position                                        | Interpretation                                                                                                  |
| New Donor Site                                                                                                                                                                                                                                                                  | 1 - HSF Matrices                      | <pre>t g t t a i g t g a g g a a a</pre>             | <p>Activation of an intronic cryptic donor site.<br/>                     Potential alteration of splicing.</p> |
|                                                                                                                                                                                                                                                                                 | ESS Site broken                       | <pre>g g t t a t g t g a g g a a c t a a c t c</pre> | <p>Alteration of an intronic ESS site.<br/>                     Probably no impact on splicing.</p>             |
| New ESE Site                                                                                                                                                                                                                                                                    | 1 - Sironi et al. - Motif 2           | <pre>t t a t g g a t g g a a a c t</pre>             | <p>Creation of an intronic ESE site.<br/>                     Probably no impact on splicing.</p>               |
|                                                                                                                                                                                                                                                                                 | 2 - ESR Sequences from Goren et al.   |                                                      |                                                                                                                 |
|                                                                                                                                                                                                                                                                                 | 3 - PESS Octamers from Zhang & Chasin |                                                      |                                                                                                                 |
|                                                                                                                                                                                                                                                                                 | 4 - Sironi et al. - Motif 1           |                                                      |                                                                                                                 |
|                                                                                                                                                                                                                                                                                 | 5 - ESE-Finder - SRp40                |                                                      |                                                                                                                 |
|                                                                                                                                                                                                                                                                                 | 6 - ESE-Finder - SF2/ASF              |                                                      |                                                                                                                 |
| 7 - ESE-Finder - SRp55                                                                                                                                                                                                                                                          |                                       |                                                      |                                                                                                                 |
| 8 - EIEs from Zhang et al.                                                                                                                                                                                                                                                      |                                       |                                                      |                                                                                                                 |

**Figure S2** – *In silico* predictions for *XRCC4* rs28360071 polymorphism (NM\_022550.3:c.315+31090del30) using Human Splicing Finder software version 3.1.
