# Supplementary material for: XRCC4 rs28360071 intronic variant is associated with increased risk for infant acute lymphoblastic leukemia with KMT2A rearrangements
Source: PubMed Central journal article supplement (PMC7734917; doi:10.1590/1678-4685-gmb-2020-0160), 2020-12-02
Supplement: 1415-4757-GMB-43-4-e20200160-s6.pdf [file 1415-4757-GMB-43-4-e20200160-s6.pdf]

**Supplementary Material to “*XRCC4* rs28360071 intronic variant is associated with increased risk for infant acute lymphoblastic leukemia with *KMT2A* rearrangements”**

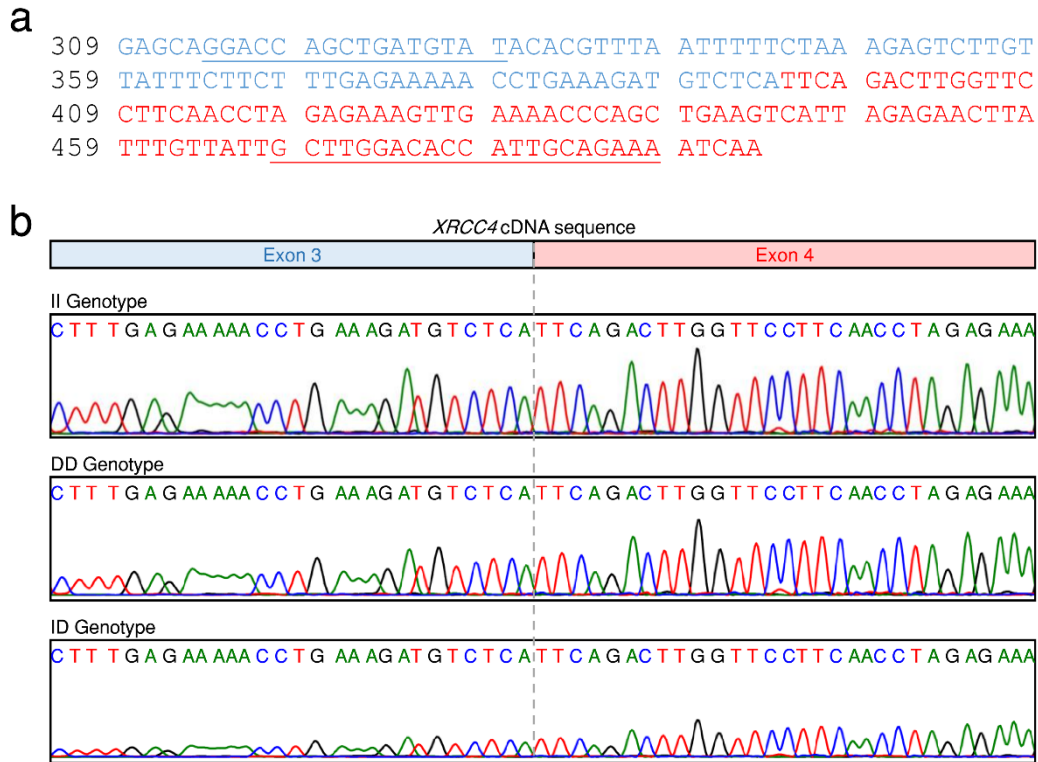

**Figure S3** - Sequencing of bone marrow *XRCC4* cDNA of patients with EAL. (a) Sequence of exon 3 and exon 4 in blue and red, respectively. Annealing sequences of primers are underlined. (b) Representative chromatograms of selected patients harboring the three different genotypes of rs28360071.
